# Supplementary material for: Identifying the potential genes in alpha synuclein driving ferroptosis of Parkinson’s disease
Source: PubMed Central journal article supplement (PMC10558439; doi:10.1038/s41598-023-44124-4), 2023-10-06
Supplement: 41598_2023_44124_MOESM1_ESM.pdf [file 41598_2023_44124_MOESM1_ESM.pdf]

Figure 6 F

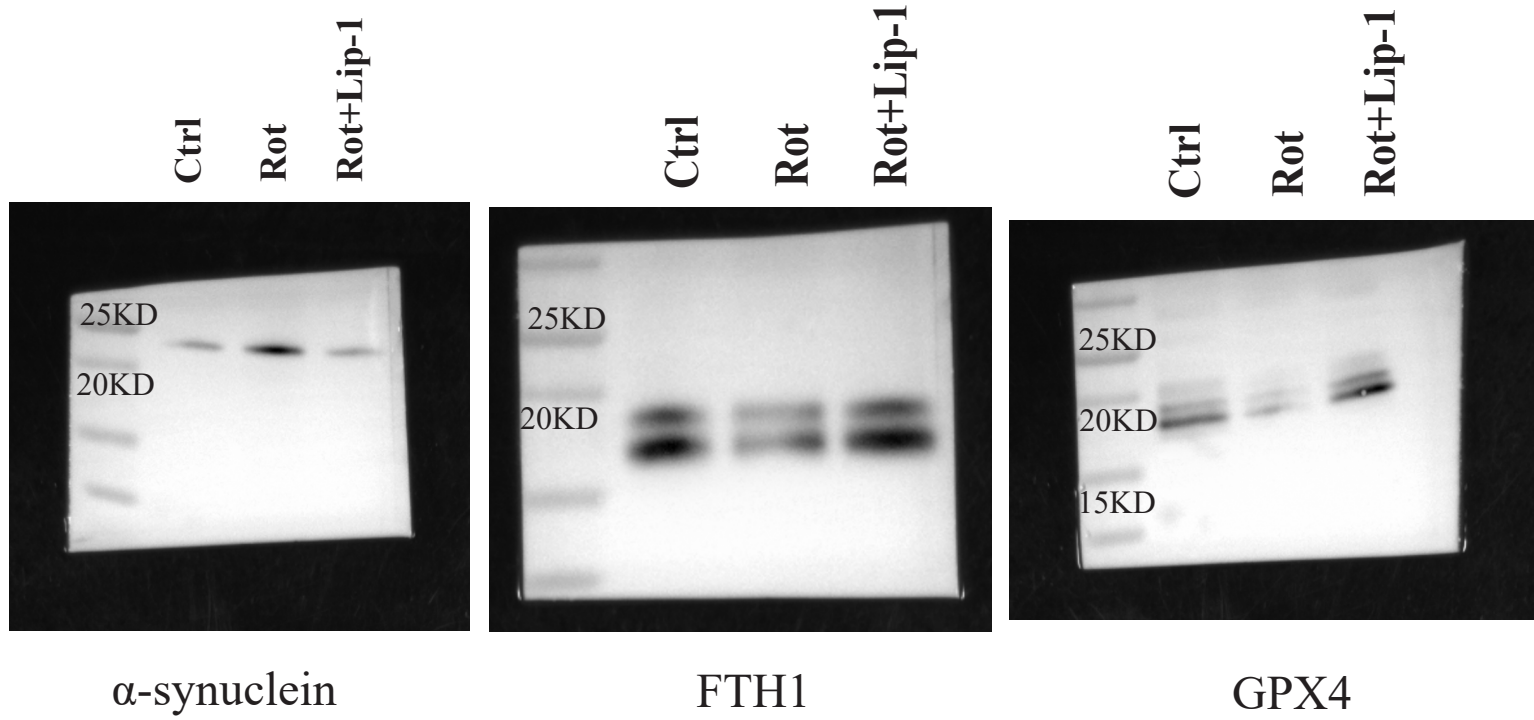

$\alpha$ -synuclein

FTH1

GPX4

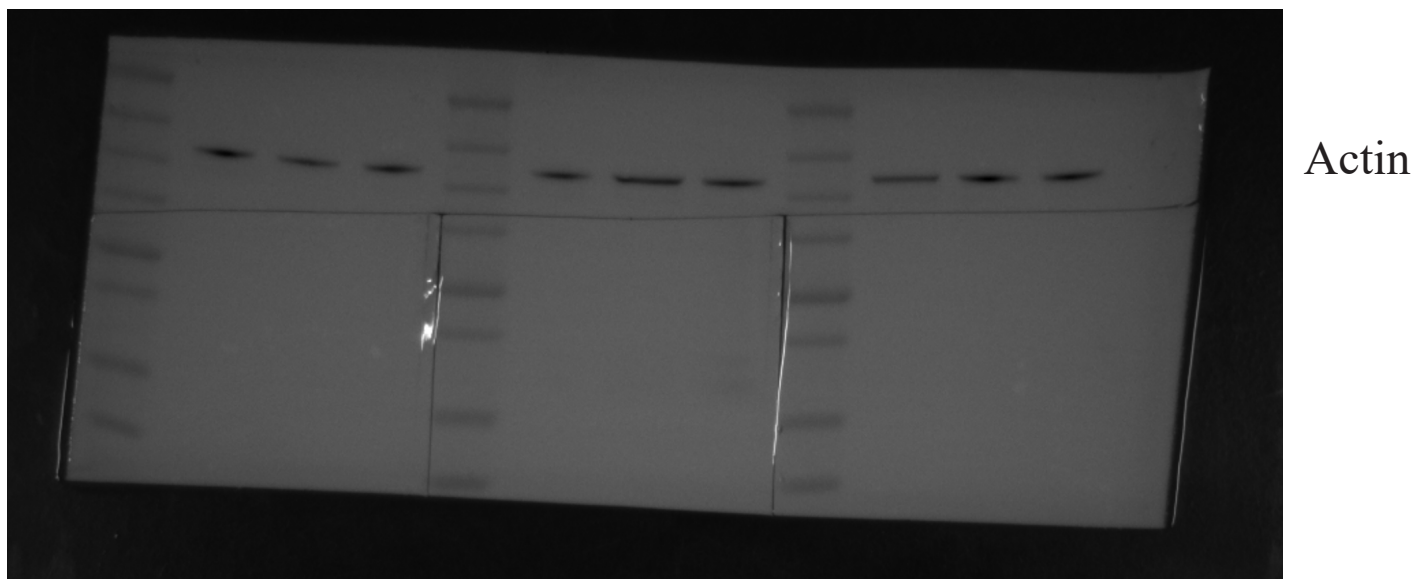

Actin

Put them together and take pictures:

Each group were from three different samples, The first three gels were Ctrl, the three gels in the middle were Rot group and the last three gels were Rot+Lip-1
